# Supplementary material for: Comparison of the diagnostic yield of aCGH and genome-wide sequencing across different neurodevelopmental disorders
Source: PubMed Central journal article supplement (PMC7994713; doi:10.1038/s41525-021-00188-7), 2021-03-25
Supplement: 41525_2021_188_MOESM1_ESM.pdf [file 41525_2021_188_MOESM1_ESM.pdf]

**Supplementary Table 1.** CNVs identified by aCGH in samples subjected to clinical exome sequencing and the detection or not by the CNV analysis

| ID      | CNV classification                                          | Locus (gene)            | Type of CNV | Genomic coordinates (aCGH) | CNV detected by clinical exome sequencing | Estimated genomic coordinates from clinical exome sequencing analysis               | Comment                                                                                     |
|---------|-------------------------------------------------------------|-------------------------|-------------|----------------------------|-------------------------------------------|-------------------------------------------------------------------------------------|---------------------------------------------------------------------------------------------|
| RM-0515 | Pathogenic (Xq28 deletion)                                  | Xq28                    | Deletion    | chrX:149247622-155221913   | Yes                                       | chrX:(148586678_149613771)-(155240084_end)                                          | --                                                                                          |
| RM-1194 | Pathogenic-incomplete penetrance (15q13.3 microduplication) | 15q13.3                 | Duplication | chr15:32029550-32438943    | Yes                                       | chr15:(31453196_32322788)-(32404110_33022881)                                       | --                                                                                          |
| RM-0066 | Pathogenic-incomplete penetrance (NRXN1 deletion syndrome)  | 2p16.3 (NRXN1)          | Deletion    | chr2:50557535-50766750     | Yes                                       | chr2:50573823-50765779                                                              | --                                                                                          |
| RM-1682 | Sex chromosome aneuploidy (XYY)                             | --                      | Duplication | --                         | Yes                                       | chrX:(1_591623)-(2692828_2700078); chrX:(154774948_155119120)-(155235154_155239470) | --                                                                                          |
| V-2638  | Sex chromosome aneuploidy (XYY)                             | --                      | Duplication | --                         | Yes                                       | chrX:(1_591623)-(2692828_2712550); chrX:(154774948_155119120)-(155235863_155237170) | --                                                                                          |
| RM-1275 | 15q11.2 BP1-BP2 microdeletion                               | 15q11.2 BP1-BP2         | Deletion    | chr15:22822019-23085219    | Yes                                       | chr15:(1_22833515)-(23086383_23889129)                                              | --                                                                                          |
| RM-0839 | VUS                                                         | q28                     | Duplication | chrX:148880773-149367334   | No                                        | --                                                                                  | Region not targeted by CES                                                                  |
| RM-0839 | VUS                                                         | 10q23.2                 | Duplication | chr10:88587545-88705602    | Yes                                       | chr10:(88492749_88635750)-(88683486_89264662)                                       | --                                                                                          |
| XF-0891 | VUS                                                         | 16p13.11                | Deletion    | chr16:15053284-15154175    | Yes                                       | chr16:(14766617_15219538)-(15231790_15489970)                                       | --                                                                                          |
| RM-1416 | VUS                                                         | 16p13.3 ( <i>RFX1</i> ) | Duplication | chr16:6873755-6935092      | No                                        | --                                                                                  | Intronic variant (not targeted by CES)                                                      |
| RM-0572 | VUS                                                         | 16p13.3 ( <i>RFX1</i> ) | Deletion    | chr16:6893768-6953471      | No                                        | --                                                                                  | Intronic variant (not targeted by CES)                                                      |
| RM-1491 | VUS                                                         | 16q23.3                 | Duplication | chr16:82524260-83138488    | No                                        | --                                                                                  | Gene in target region (CDH13) covered by CES but not detected by the CNV analysis algorithm |
| RM-1461 | VUS                                                         | 17p11.2                 | Deletion    | chr17:19142083-20143948    | Yes                                       | chr17:(18259308_19240967)-(20217393_20397286)                                       | --                                                                                          |
| RM-0694 | VUS                                                         | 17p13.3                 | Deletion    | chr17:1326321-1487047      | Yes                                       | chr17:(1257652_1371110)-(1465893_1554085)                                           | --                                                                                          |

|           |     |                            |             |                           |     |                                                  |                                                                                                                     |
|-----------|-----|----------------------------|-------------|---------------------------|-----|--------------------------------------------------|---------------------------------------------------------------------------------------------------------------------|
| RM-0132   | VUS | 17q12                      | Duplication | chr17:31962547-32937481   | Yes | chr17:(30815573_32582347)-(32614719_33310014)    | --                                                                                                                  |
| RM-0622   | VUS | 1q42.2<br>( <i>DISC1</i> ) | Duplication | chr1:231734070-231806283  | No  | --                                               | Intronic variant (not targeted by CES)                                                                              |
| RM-0918   | VUS | 1q42.2<br>( <i>DISC1</i> ) | Duplication | chr1:231719623-231806283  | No  | --                                               | Intronic variant (not targeted by CES)                                                                              |
| V-1809    | VUS | 22q11.21                   | Deletion    | chr22:20033538-20060533   | No  | --                                               | Region not targeted by CES                                                                                          |
| XF-1046_1 | VUS | 2p16.3<br>( <i>NRXN1</i> ) | Deletion    | chr2:50986477-51096409    | No  | --                                               | Intronic variant (not targeted by CES)                                                                              |
| XF-1046_2 | VUS | 2p16.3<br>( <i>NRXN1</i> ) | Deletion    | chr2:50986477-51096409    | No  | --                                               | Intronic variant (not targeted by CES)                                                                              |
| RM-0432   | VUS | 2q21.1                     | Deletion    | chr2:131483022-131886567  | No  | --                                               | Region not targeted by CES                                                                                          |
| V-2711    | VUS | 2q24.1                     | Deletion    | chr2:156730580-157218918  | Yes | chr2:(155307074_157182246)-(157186708_157332608) | --                                                                                                                  |
| RM-1335   | VUS | 3p25.2 ( <i>RAF1</i> )     | Duplication | chr3:12630854-12799925    | Yes | chr3:(12627314_12632282)-(12660235_13860430)     | --                                                                                                                  |
| RM-0839   | VUS | 3p25.2 ( <i>RAF1</i> )     | Duplication | chr3:12630854-12799926    | Yes | chr3:(12627314_12632282)-(12660235_13860430)     | --                                                                                                                  |
| RM-1423   | VUS | 4q24                       | Duplication | chr4:103898527-104624966  | Yes | chr4:(103806598_104510829)-(104640842_106155089) | --                                                                                                                  |
| RM-1069   | VUS | 4q28.3                     | Deletion    | chr4:136421277-138398102  | No  | --                                               | Region not targeted by CES                                                                                          |
| RM-1615   | VUS | 7q35                       | Deletion    | chr7:146213130-146293204  | No  | --                                               | Intronic variant (not targeted by CES)                                                                              |
| RM-1460   | VUS | 9p24.3                     | Duplication | chr9:209020-327369        | Yes | chr9:(1_271612)-(340336_370205)                  | --                                                                                                                  |
| RM-0506   | VUS | 9q21.33-q22.1              | Duplication | chr9:88778748-91703527    | No  | --                                               | Only one gene from the target region included in CES ( <i>GAS1</i> ) but not detected by the CNV analysis algorithm |
| RM-0365   | VUS | Xp22.31                    | Deletion    | chrX: 6,456,777-8,119,329 | Yes | chrX:(6069518_6451774)-(7268312_8502349)         | --                                                                                                                  |
| RM-1160   | VUS | Xp22.33                    | Duplication | chrX:359396-600393        | Yes | chrX:(1_591623)-(595570_601524)                  | --                                                                                                                  |
