# Supplementary material for: Comparison of the diagnostic yield of aCGH and genome-wide sequencing across different neurodevelopmental disorders
Source: PubMed Central journal article supplement (PMC7994713; doi:10.1038/s41525-021-00188-7), 2021-03-25
Supplement: 41525_2021_188_MOESM2_ESM.pdf [file 41525_2021_188_MOESM2_ESM.pdf]

## Reporting Summary

Nature Research wishes to improve the reproducibility of the work that we publish. This form provides structure for consistency and transparency in reporting. For further information on Nature Research policies, see our [Editorial Policies](#) and the [Editorial Policy Checklist](#).

### Statistics

For all statistical analyses, confirm that the following items are present in the figure legend, table legend, main text, or Methods section.

- |     |           |
|-----|-----------|
| n/a | Confirmed |
|-----|-----------|
- The exact sample size ( $n$ ) for each experimental group/condition, given as a discrete number and unit of measurement
  - A statement on whether measurements were taken from distinct samples or whether the same sample was measured repeatedly
  - The statistical test(s) used AND whether they are one- or two-sided  
*Only common tests should be described solely by name; describe more complex techniques in the Methods section.*
  - A description of all covariates tested
  - A description of any assumptions or corrections, such as tests of normality and adjustment for multiple comparisons
  - A full description of the statistical parameters including central tendency (e.g. means) or other basic estimates (e.g. regression coefficient) AND variation (e.g. standard deviation) or associated estimates of uncertainty (e.g. confidence intervals)
  - For null hypothesis testing, the test statistic (e.g.  $F$ ,  $t$ ,  $r$ ) with confidence intervals, effect sizes, degrees of freedom and  $P$  value noted  
*Give  $P$  values as exact values whenever suitable.*
  - For Bayesian analysis, information on the choice of priors and Markov chain Monte Carlo settings
  - For hierarchical and complex designs, identification of the appropriate level for tests and full reporting of outcomes
  - Estimates of effect sizes (e.g. Cohen's  $d$ , Pearson's  $r$ ), indicating how they were calculated

*Our web collection on [statistics for biologists](#) contains articles on many of the points above.*

### Software and code

Policy information about [availability of computer code](#)

|                 |                                                                                                                                                                                                                                                                                       |
|-----------------|---------------------------------------------------------------------------------------------------------------------------------------------------------------------------------------------------------------------------------------------------------------------------------------|
| Data collection | aCGH data were collected with the with the Genoglyphix® platform (PerkinElmer, Inc). Clinical exome sequencing data were collected using the Variant Study platform (Illumina, San Diego, CA) and SOPHiA DDM™ analysis platform by Sophia Genetics (CES; Sophia Genetics, Boston, MA) |
| Data analysis   | aCGH data were analyzed with the with the Genoglyphix® platform (PerkinElmer, Inc). Clinical exome sequencing data were analyzed using the Variant Study platform (Illumina, San Diego, CA) and SOPHiA DDM™ analysis platform by Sophia Genetics (CES; Sophia Genetics, Boston, MA)   |

For manuscripts utilizing custom algorithms or software that are central to the research but not yet described in published literature, software must be made available to editors and reviewers. We strongly encourage code deposition in a community repository (e.g. GitHub). See the Nature Research [guidelines for submitting code & software](#) for further information.

### Data

Policy information about [availability of data](#)

All manuscripts must include a [data availability statement](#). This statement should provide the following information, where applicable:

- Accession codes, unique identifiers, or web links for publicly available datasets
- A list of figures that have associated raw data
- A description of any restrictions on data availability

The sequencing data that support the findings of this study will be available in European Genome-Phenome Archive (<https://ega-archive.org/>) before publication of the manuscript

## Field-specific reporting

Please select the one below that is the best fit for your research. If you are not sure, read the appropriate sections before making your selection.

Life sciences       Behavioural & social sciences       Ecological, evolutionary & environmental sciences

For a reference copy of the document with all sections, see [nature.com/documents/nr-reporting-summary-flat.pdf](https://www.nature.com/documents/nr-reporting-summary-flat.pdf)

## Life sciences study design

All studies must disclose on these points even when the disclosure is negative.

|                 |                                                                                                            |
|-----------------|------------------------------------------------------------------------------------------------------------|
| Sample size     | <input type="text" value="No sample size calculation was performed. All samples available were included"/> |
| Data exclusions | <input type="text" value="No data were excluded"/>                                                         |
| Replication     | <input type="text" value="No replication was performed"/>                                                  |
| Randomization   | <input type="text" value="Not relevant for the study"/>                                                    |
| Blinding        | <input type="text" value="Not relevant for the study"/>                                                    |

## Reporting for specific materials, systems and methods

We require information from authors about some types of materials, experimental systems and methods used in many studies. Here, indicate whether each material, system or method listed is relevant to your study. If you are not sure if a list item applies to your research, read the appropriate section before selecting a response.

### Materials & experimental systems

| n/a                                 | Involvement in the study                                        |
|-------------------------------------|-----------------------------------------------------------------|
| <input checked="" type="checkbox"/> | <input type="checkbox"/> Antibodies                             |
| <input checked="" type="checkbox"/> | <input type="checkbox"/> Eukaryotic cell lines                  |
| <input checked="" type="checkbox"/> | <input type="checkbox"/> Palaeontology and archaeology          |
| <input checked="" type="checkbox"/> | <input type="checkbox"/> Animals and other organisms            |
| <input type="checkbox"/>            | <input checked="" type="checkbox"/> Human research participants |
| <input checked="" type="checkbox"/> | <input type="checkbox"/> Clinical data                          |
| <input checked="" type="checkbox"/> | <input type="checkbox"/> Dual use research of concern           |

### Methods

| n/a                                 | Involvement in the study                        |
|-------------------------------------|-------------------------------------------------|
| <input checked="" type="checkbox"/> | <input type="checkbox"/> ChIP-seq               |
| <input checked="" type="checkbox"/> | <input type="checkbox"/> Flow cytometry         |
| <input checked="" type="checkbox"/> | <input type="checkbox"/> MRI-based neuroimaging |

## Human research participants

Policy information about [studies involving human research participants](#)

|                            |                                                                                                                                                                                                                                                                                                                                                                                                       |
|----------------------------|-------------------------------------------------------------------------------------------------------------------------------------------------------------------------------------------------------------------------------------------------------------------------------------------------------------------------------------------------------------------------------------------------------|
| Population characteristics | <input type="text" value="The mean age of the sample included in the study was 8±6 years (range of 0-64years), with 1,010 males (71.5%) and 402 females (28.5%), 1412 were subjected to aCGH and 245 to clinical exome sequencing"/>                                                                                                                                                                  |
| Recruitment                | <input type="text" value="Patients were selected based on the clinical phenotype, neurodevelopmental disorder, and the genetic test performed Comparative Genomic Hybridization array and clinical exome sequencing. There is a potential bias in the selection of samples subjected to clinical exome sequencing, toward more complex phenotypes more likely to be conducive to positive findings"/> |
| Ethics oversight           | <input type="text" value="IRB at Fundacion Jimenez Diaz"/>                                                                                                                                                                                                                                                                                                                                            |

Note that full information on the approval of the study protocol must also be provided in the manuscript.
